# Supplementary material for: Historical clay extraction from paleo-channel deposits of the late-glacial Bergstraßenneckar in the Upper Rhine Graben, southwestern Germany
Source: Copernicus journal article supplement (doi:10.5194/egqsj-75-33-2026), 2026-02-16
Supplement: Supplementary file 1 [file Supplement_Geochemistry_Grain-size_Pit2.xlsx]

## Sheet: Pit 2
	Depth (cm)	Note	Geochemistry																					Grain size
Sample ID			Water content (%)	LOI550 (%)	LOI950 (%)	Carbonate content (%)	N (%)	C (%)	S (%)	As (mg/kg)	Zn (mg/kg)	Cu (mg/kg)	Fe (mg/kg)	Mn (mg/kg)	(mg/kg)	Ca (mg/kg)	K (mg/kg)	Zr (mg/kg)	Rb (mg/kg)	Zr/Ti	Zr/Rb	Fe/Mn	Ca/Ti	Mean	Sorting	% COARSE SAND:	% MEDIUM SAND:	% FINE SAND:	% V FINE SAND:	% V COARSE SILT:	% COARSE SILT:	% MEDIUM SILT:	% FINE SILT:	% V FINE SILT:	% CLAY:
RL Grube 2/1	15		11.7306	6.04045	4.06938	3.56652	0.269	2.61	0.014	22.15	61.27	57.21	20863.1	636.09	7077.94	117677	59130.5	117.82	83.09	0.0166461	1.41798	32.7989	16.6258	23.9113	6.21445	0.000388389	0.109036	0.145761	0.0713339	0.0338578	0.203117	0.106053	0.13799	0.124114	0.0683481
RL Grube 2/2	27		1.11413	1.27939	2.596	2.67021	0.039	0.998	0.006	9.43	26.14	39.75	6073.41	372.72	2677.62	77665.1	47270	66.62	66.58	0.0248803	1.0006	16.2948	29.0053	325.792	1.48016	0.131221	0.618991	0.237647	0.0121405	0	0	0	0	0	0
RL Grube 2/3	35	Gastropod fragments	10.3356	5.22863	3.57948	3.96344	0.275	2.61	0.011	17.8	41.03	47.91	13857.2	538.75	4713.32	139813	46552.9	130.94	68.88	0.0277808	1.90099	25.7211	29.6634	81.2062	5.06548	0.0132668	0.327107	0.178316	0.0670203	0.0467338	0.158834	0.0725515	0.0605127	0.0483713	0.0272865
RL Grube 2/4	39		0.075188	1.59442	1.05334	1.29577	0.059	0.769	0.006															116.244	4.02048	0.0100393	0.330343	0.320639	0.116692	0.0405116	0.0667639	0.0227269	0.0276831	0.0351063	0.0294944
RL Grube 2/5	45	Gastropod fragments	20.993	15.2865	11.2361	24.3547	0.851	9.75	0.017	33.33	64.23	65.04	31301.3	895.93	6399.65	364571	38690	118.08	66.48	0.018451	1.77617	34.9372	56.9673	21.3598	3.57662	0	0	0.0320434	0.18533	0.188591	0.275607	0.1039	0.0945748	0.0781079	0.041846
RL Grube 2/6	52	Gastropod fragments	16.944	5.57248	20.0848	69.8695	0.176	8.05	0.014	41.3	39.19	66.49	46150.3	2336.13	3988.98	658168	34553.9	71.15	44.61	0.0178366	1.59493	19.755	164.997	10.0796	5.5096	0	0.00196093	0.0158211	0.128168	0.0855766	0.22796	0.0683554	0.105115	0.156707	0.210337
RL Grube 2/7	76		21.3073	6.66276	3.52455	1.68392	0.161	1.38	0.02	24.19	106.73	63.94	40775.9	438.85	13850.3	15748.6	79369.8	135.57	157.8	0.00978825	0.859125	92.9153	1.13706	26.5547	5.2245	0	0.0148384	0.190797	0.233537	0.0889685	0.151341	0.0450145	0.0939166	0.114904	0.066683
RL Grube 2/8	101		36.2538	23.9422	3.77475	0.915907	0.939	12	0.229	31.41	67.49	57.41	32747.5	330.14	11635.5	59416.3	67981.8	95.41	116.42	0.00819994	0.819533	99.1928	5.10649
RL Grube 2/9	123		58.3744	70.3389	5.96708	0.499975	2.55	38	0.277	123.88	12.3	27.29	32336.2	376.57	2612.41	314825	24733.9	12.87	23.89	0.00492649	0.538719	85.8705	120.511
RL Grube 2/10	158		53.8089	12.1807	20.4311	95.7091	0.706	17.4	0.037	38.95	22.45	51.52	5665.92	694.93	458.09	1.42872e+06	3314.03	10	10	0.0218298	1	8.15322	3118.86	87.946	2.44398	7.93344e-05	0.0942465	0.290329	0.299975	0.16878	0.0996004	0.0203406	0.0122058	0.010614	0.00382928
RL Grube 2 Sand	63		2.49501	0.365117	1.83244	3.9218	0.002	0.694	0.01	8.91	22.69	34.2	3800.19	267.84	1655.83	65761.5	44091.4	108.6	62.56	0.0655864	1.73593	14.1883	39.7151	270.233	1.47501	0.0379544	0.555566	0.372847	0.0295957	0	0.00403633	0	0	0	0
