# Supplementary material for: Historical clay extraction from paleo-channel deposits of the late-glacial Bergstraßenneckar in the Upper Rhine Graben, southwestern Germany
Source: Copernicus journal article supplement (doi:10.5194/egqsj-75-33-2026), 2026-02-16
Supplement: Supplementary file [file egqsj-75-33-2026-supplement-title-page.pdf › egqsj-75-33-2026-supplement-title-page.pdf]

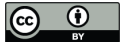

*Supplement of*

**Historical clay extraction from paleo-channel deposits of the late-glacial Bergstraßenneckar in the Upper Rhine Graben, southwestern Germany**

**Felix Henselowsky et al.**

*Correspondence to:* Felix Henselowsky (felix.henselowsky@uni-mainz.de), Annette Kadereit (annette.kadereit@uni-heidelberg.de), and Max Engel (max.engel@uni-heidelberg.de)

- egqsj-75-33-2026-supplement-title-page.pdf
- egqsj-2025-9-supplement
  - 20260204\_Supplement.pdf
  - Supplement\_Geochemistry\_Grain-size\_Pit2.xlsx

The copyright of individual parts of the supplement might differ from the article licence.
